# Supplementary material
Source: publisher figshare collection journal article supplement (https://asha.figshare.com/articles/dataset/_/7927046)
Supplement: Supplementary file 1 [file 1]

**Supplemental Material S1.** Additional model results for the word form outcome.

| Fixed effects         | Model C    |        |       | Model D    |        |       | Model E    |        |       | Model F    |        |       |
|-----------------------|------------|--------|-------|------------|--------|-------|------------|--------|-------|------------|--------|-------|
|                       | b          | 95% CI |       | b          | 95% CI |       | b          | 95% CI |       | b          | 95% CI |       |
| Group (DLD vs. TD)    | -0.78      | -2.49  | 0.94  | -1.49      | -3.87  | 0.89  | -0.60      | -2.36  | 1.16  | -1.31      | -3.72  | 1.11  |
| Condition (RR vs. RS) | 2.83       | 1.12   | 4.53  | 2.82       | 1.19   | 4.46  | 3.00       | 1.25   | 4.75  | 3.00       | 1.31   | 4.69  |
| Time (1wk vs. 5min)   | -0.48      | -1.18  | 0.23  | -0.48      | -1.20  | 0.25  | -0.30      | -1.12  | 0.52  | -0.30      | -1.14  | 0.54  |
| Group x Time          | 0.45       | -0.36  | 1.26  | 0.45       | -0.41  | 1.31  | 0.10       | -1.05  | 1.25  | 0.08       | -1.14  | 1.29  |
| Cond x Time           | 0.05       | -0.76  | 0.86  | 0.05       | -0.80  | 0.91  | -0.30      | -1.45  | 0.85  | -0.30      | -1.48  | 0.88  |
| Group x Cond.         | -0.55      | -2.89  | 1.79  | -0.07      | -2.37  | 2.23  | -0.90      | -3.38  | 1.58  | -0.44      | -2.90  | 2.01  |
| Group x Cond. x Time  |            |        |       |            |        |       | 0.70       | -0.93  | 2.33  | 0.74       | -0.97  | 2.46  |
| PPVT-4                |            |        |       | -0.04      | -0.12  | 0.05  |            |        |       | -0.04      | -0.12  | 0.05  |
| Mother's education    |            |        |       | 0.05       | -0.35  | 0.46  |            |        |       | 0.05       | -0.35  | 0.46  |
| Intercept             | 3.39       | 2.16   | 4.62  | 6.70       | -4.54  | 17.96 | 3.30       | 2.05   | 4.55  | 6.62       | -4.63  | 17.87 |
| <b>Random effects</b> | $\sigma^2$ |        |       | $\sigma^2$ |        |       | $\sigma^2$ |        |       | $\sigma^2$ |        |       |
| Condition             | 6.280      | 2.98   | 13.25 | 5.61       | 2.56   | 12.28 | 6.26       | 2.97   | 13.24 | 5.59       | 2.55   | 12.28 |
| Intercept             | 3.184      | 1.51   | 6.71  | 3.53       | 1.57   | 7.92  | 3.18       | 1.51   | 6.71  | 3.52       | 1.57   | 7.92  |

*Note.*  $N = 20$ , observations = 80. Effects with 95% confidence intervals (CI) that do not include 0 are statistically significant at  $\alpha = 0.05$ . Sample sizes for models with covariates (Model D, Model F) = 19 children and 76 repeated observations. DLD = developmental language disorder; TD = typically developing; RR = repeated retrieval; RS = repeated study; Cond. = condition; PPVT-4 = Peabody Picture Vocabulary Test–Fourth Edition (PPVT-4; Dunn & Dunn, 2007).

**Reference**

Dunn, L., & Dunn, D. (2007). *Peabody Picture Vocabulary Test–Fourth Edition (PPVT-4)*. Minneapolis, MN: AGS/Pearson.
