# Supplementary material
Source: publisher figshare collection journal article supplement (https://asha.figshare.com/articles/dataset/_/7927046)
Supplement: Supplementary file 2 [file 1]

**Supplemental Material S3.** Model results for the recognition outcome.

|                       | Model A |            |       | Model B |            |       |
|-----------------------|---------|------------|-------|---------|------------|-------|
|                       | b       | 95% CI     |       | b       | 95% CI     |       |
| <b>Fixed effects</b>  |         |            |       |         |            |       |
| Group (DLD vs. TD)    | -0.66   | -1.64      | 0.32  | -0.42   | -1.39      | 0.55  |
| Condition (RR vs. RS) | -0.23   | -0.91      | 0.46  | -0.03   | -0.54      | 0.49  |
| Time (1wk vs. 5min)   | -0.38   | -1.02      | 0.27  | -0.18   | -0.65      | 0.28  |
| Group × Time          |         |            |       |         |            |       |
| Cond. × Time          |         |            |       |         |            |       |
| Group × Cond.         |         |            |       |         |            |       |
| Group × Cond. × Time  |         |            |       |         |            |       |
| PPVT-4                |         |            |       | -0.01   | -0.04      | 0.02  |
| Mother's education    |         |            |       | 0.08    | -0.09      | 0.25  |
| Intercept             | 15.82   | 15.08      | 16.56 | 15.54   | 10.87      | 20.20 |
| <b>Random effects</b> |         | $\sigma^2$ |       |         | $\sigma^2$ |       |
| Time                  | 0.89    | 0.20       | 3.88  | 0.21    | 0.01       | 4.59  |
| Condition             | 1.19    | 0.35       | 4.01  | 0.45    | 0.08       | 2.59  |
| Intercept             | 0.66    | 0.17       | 2.58  | 0.34    | 0.07       | 1.61  |

*Note.*  $N = 20$ , observations = 80. Effects with 95% confidence intervals (CI) that do not include 0 are statistically significant at  $\alpha = 0.05$ . Sample size for the model with a covariate (Model B) = 19 children and 76 repeated observations. DLD = developmental language disorder; TD = typically developing; RR = repeated retrieval; RS = repeated study; Cond. = condition; PPVT-4 = Peabody Picture Vocabulary Test–Fourth Edition (PPVT-4; Dunn & Dunn, 2007).

**Reference**

Dunn, L., & Dunn, D. (2007). *Peabody Picture Vocabulary Test–Fourth Edition (PPVT-4)*. Minneapolis, MN: AGS/Pearson.
