# Supplementary material
Source: publisher figshare collection journal article supplement (https://asha.figshare.com/articles/dataset/_/7927046)
Supplement: Supplementary file 3 [file 1]

**Supplemental Material S4.** Additional model results for the recognition outcome.

| Fixed effects         | Model C    |        |       | Model D    |        |       | Model E    |        |       | Model F    |        |       |
|-----------------------|------------|--------|-------|------------|--------|-------|------------|--------|-------|------------|--------|-------|
|                       | b          | 95% CI |       | b          | 95% CI |       | b          | 95% CI |       | b          | 95% CI |       |
| Group (DLD vs. TD)    | -0.28      | -1.39  | 0.84  | -0.18      | -1.28  | 0.92  | -0.30      | -1.53  | 0.93  | -0.42      | -1.60  | 0.75  |
| Condition (RR vs RS)  | 0.03       | -1.06  | 1.11  | 0.23       | -0.61  | 1.07  | 0.00       | -1.20  | 1.20  | 0.00       | -0.93  | 0.93  |
| Time (1wk vs. 5min)   | -0.18      | -1.21  | 0.86  | 0.03       | -0.76  | 0.82  | -0.20      | -1.36  | 0.96  | -0.20      | -1.08  | 0.68  |
| Group × time          | -0.65      | -1.94  | 0.64  | -0.28      | -1.24  | 0.68  | -0.60      | -2.24  | 1.04  | 0.20       | -1.08  | 1.48  |
| Cond. × time          | 0.25       | -0.74  | 1.24  | -0.16      | -1.02  | 0.70  | 0.30       | -1.12  | 1.72  | 0.30       | -0.88  | 1.48  |
| Group × Cond.         | -0.75      | -2.12  | 0.62  | -0.37      | -1.42  | 0.68  | -0.70      | -2.40  | 1.00  | 0.11       | -1.24  | 1.46  |
| Group × Cond. × Time  |            |        |       |            |        |       | -0.10      | -2.11  | 1.91  | -0.97      | -2.68  | 0.74  |
| PPVT-4                |            |        |       | -0.01      | -0.04  | 0.02  |            |        |       | -0.01      | -0.04  | 0.02  |
| Mother’s education    |            |        |       | 0.08       | -0.09  | 0.24  |            |        |       | 0.08       | -0.09  | 0.25  |
| Intercept             | 15.69      | 14.86  | 16.51 | 15.38      | 10.71  | 20.05 | 15.70      | 14.83  | 16.57 | 15.50      | 10.83  | 20.17 |
| <b>Random effects</b> | $\sigma^2$ |        |       | $\sigma^2$ |        |       | $\sigma^2$ |        |       | $\sigma^2$ |        |       |
| Time                  | 0.88       | 0.19   | 4.09  | 0.23       | 0.01   | 4.83  | 0.88       | 0.18   | 4.19  | 0.23       | 0.01   | 4.70  |
| Condition             | 1.16       | 0.33   | 4.12  | 0.45       | 0.07   | 2.80  | 1.15       | 0.32   | 4.17  | 0.45       | 0.07   | 2.79  |
| Intercept             | 0.66       | 0.17   | 2.63  | 0.33       | 0.07   | 1.46  | 0.66       | 0.16   | 2.68  | 0.33       | 0.07   | 1.66  |

Note.  $N = 20$ , observations = 80. Effects with 95% confidence intervals (CI) that do not include 0 are statistically significant at  $\alpha = 0.05$ . Sample sizes for models with covariates (Model D, Model F) = 19 children and 76 repeated observations. DLD = developmental language disorder; TD = typically developing; RR = repeated retrieval; RS = repeated study; Cond. = condition; PPVT-4 = Peabody Picture Vocabulary Test–Fourth Edition (PPVT-4; Dunn & Dunn, 2007).

**Reference**

Dunn, L., & Dunn, D. (2007). *Peabody Picture Vocabulary Test–Fourth Edition (PPVT-4)*. Minneapolis, MN: AGS/Pearson.
