# Supplementary material
Source: publisher figshare collection journal article supplement (https://asha.figshare.com/articles/dataset/_/7927046)
Supplement: Supplementary file 4 [file 1]

**Supplemental Material S2.** Additional model results for the meaning outcome

|                       | Model C |            |      | Model D |            |       | Model E |            |      | Model F |            |       |      |
|-----------------------|---------|------------|------|---------|------------|-------|---------|------------|------|---------|------------|-------|------|
|                       | b       | 95% CI     |      | b       | 95% CI     |       | b       | 95% CI     |      | b       | 95% CI     |       |      |
| <b>Fixed effects</b>  |         |            |      |         |            |       |         |            |      |         |            |       |      |
| Group (DLD vs. TD)    | -0.40   | -2.09      | 1.29 | -0.48   | -2.74      | 1.77  | -0.30   | -2.01      | 1.41 | -0.37   | -2.65      | 1.90  |      |
| Condition (RR vs. RS) | 0.90    | -0.20      | 2.00 | 0.90    | -0.22      | 2.01  | 1.00    | -0.14      | 2.14 | 1.00    | -0.15      | 2.15  |      |
| Time (1wk vs. 5min)   | -0.20   | -0.68      | 0.28 | -0.21   | -0.70      | 0.29  | -0.10   | -0.65      | 0.45 | -0.10   | -0.67      | 0.47  |      |
| Group × Time          | 0.10    | -0.45      | 0.65 | 0.10    | -0.48      | 0.68  | -0.10   | -0.88      | 0.68 | -0.12   | -0.95      | 0.70  |      |
| Cond. × Time          | 0.20    | -0.35      | 0.75 | 0.21    | -0.37      | 0.79  | 0.00    | -0.78      | 0.78 | 0.00    | -0.80      | 0.80  |      |
| Group × Cond.         | 0.20    | -1.31      | 1.71 | 0.33    | -1.23      | 1.90  | 0.00    | -1.61      | 1.61 | 0.11    | -1.56      | 1.78  |      |
| Group × Cond. × Time  |         |            |      |         |            |       | 0.40    | -0.70      | 1.50 | 0.44    | -0.72      | 1.61  |      |
| PPVT-4                |         |            |      | -0.03   | -0.11      | 0.05  |         |            |      | -0.03   | -0.11      | 0.05  |      |
| Mother's education    |         |            |      | 0.15    | -0.24      | 0.53  |         |            |      | 0.15    | -0.24      | 0.53  |      |
| Intercept             | 6.75    | 5.55       | 7.95 | 7.92    | -2.85      | 18.68 | 6.70    | 5.49       | 7.91 | 7.86    | -2.90      | 18.62 |      |
| <b>Random effects</b> |         | $\sigma^2$ |      |         | $\sigma^2$ |       |         | $\sigma^2$ |      |         | $\sigma^2$ |       |      |
| Condition             |         | 2.57       | 1.20 | 5.53    | 2.61       | 1.18  | 5.79    | 2.56       | 1.19 | 5.53    | 2.60       | 1.17  | 5.78 |
| Intercept             |         | 3.42       | 1.70 | 6.87    | 3.43       | 1.59  | 7.40    | 3.41       | 1.70 | 6.86    | 3.42       | 1.58  | 7.38 |

*Note.*  $N = 20$ , observations = 80. Effects with 95% confidence intervals (CI) that do not include 0 are statistically significant at  $\alpha = 0.05$ . Sample sizes for models with covariations (Model D, Model F) = 19 children and 76 repeated observations. DLD = developmental language disorder; TD = typically developing; RR = repeated retrieval; RS = repeated study; Cond. = condition; PPVT-4 = Peabody Picture Vocabulary Test–Fourth Edition (PPVT-4; Dunn & Dunn, 2007).

**Reference**

Dunn, L., & Dunn, D. (2007). *Peabody Picture Vocabulary Test–Fourth Edition (PPVT-4)*. Minneapolis, MN: AGS/Pearson.
